# Supplementary material for: KIAA1199 interacts with glycogen phosphorylase kinase β-subunit (PHKB) to promote glycogen breakdown and cancer cell survival
Source: PubMed Central journal article supplement (PMC4196182; doi:10.18632/oncotarget.2220), 2014-07-15
Supplement: oncotarget-05-7040-s001.pdf [file oncotarget-05-7040-s001.pdf]

## KIAA1199 interacts with glycogen phosphorylase kinase $\beta$ -subunit (PHKB) to promote glycogen breakdown and cancer cell survival

Supplementary Material

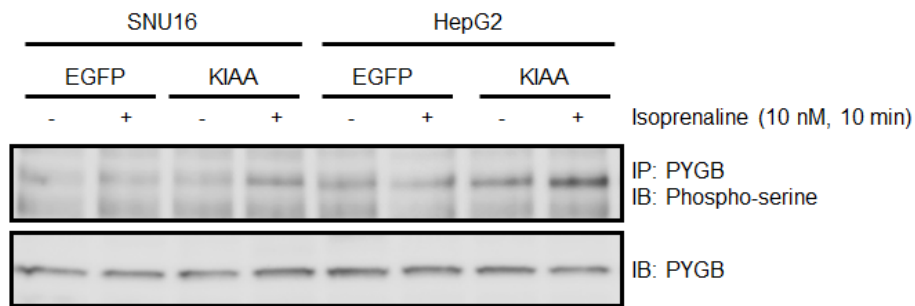

**Supplementary Figure 1:** KIAA1199 enhanced the phosphorylation of PYGB after exposure to isoprenaline (10 nM, 10 min) under serum-free conditions. Immunoprecipitation obtained using anti-PYGB antibody was analyzed using western blotting with an antibody against phospho-serine residue. Western blotting analyses for PYGB were also performed.
